# Supplementary material for: Variability and predictors of weekly pesticide exposure in applicators from organic, sustainable and conventional smallholder farms in Costa Rica
Source: PubMed Central journal article supplement — Occup Environ Med. 2019 Dec 3;77(1):40–7. doi: 10.1136/oemed-2019-105884 (PMC6929695; doi:10.1136/oemed-2019-105884), 2019-12-03
Supplement: oemed-2019-105884supp001.pdf [file oemed-2019-105884supp001.pdf]

**Supplementary Table S1.** Active ingredients and the respective pesticide products reported to be used among the 221 pesticide applicators in Zarcero County, Costa Rica, 2016.

| Group        | Chemical family     | Active ingredient | Pesticide products containing active ingredient available in Costa Rica                                                                                        | WHO hazard class*                                                                                                                                                   | Applied in year before the study (n221; %) |
|--------------|---------------------|-------------------|----------------------------------------------------------------------------------------------------------------------------------------------------------------|---------------------------------------------------------------------------------------------------------------------------------------------------------------------|--------------------------------------------|
| Fungicides   | Pyridinecarboxamids | Boscalid          | Bellis <sup>®</sup> , Endura <sup>®</sup>                                                                                                                      | U                                                                                                                                                                   | 59.3                                       |
|              | Benzimidazoles      | Carbendazim       | Afin <sup>®</sup> , Cozaid <sup>®</sup> , Crotonox <sup>®</sup> , Carbendazina <sup>®</sup>                                                                    | U                                                                                                                                                                   | 44.8                                       |
|              | Chloronitriles      | Chlorothalonil    | Bravo <sup>®</sup> , Bravonil <sup>®</sup> , Knight <sup>®</sup> , Talonil <sup>®</sup> , Thalonex <sup>®</sup> , Folio Gold <sup>®</sup> , Odeon <sup>®</sup> | U                                                                                                                                                                   | 82.4                                       |
|              | Dithiocarbamates    | Mancozeb          | Dithane <sup>®</sup> , Mancol <sup>®</sup> , Ridomil <sup>®</sup> , Titan <sup>®</sup>                                                                         | U                                                                                                                                                                   | 62.0                                       |
|              | Carbamate           | Propamocarb       | Acrobat CT <sup>®</sup> , Previcur <sup>®</sup> , Proplant <sup>®</sup> , Prevalor <sup>®</sup>                                                                | U                                                                                                                                                                   | 62.0                                       |
|              | Carbamate           | Propineb          | Antracol <sup>®</sup> , Inicol <sup>®</sup> , Taifen <sup>®</sup>                                                                                              | U                                                                                                                                                                   | 48.4                                       |
| Herbicides   | Phosphonoglycine    | Glyphosate        | Atila <sup>®</sup> , Evigras <sup>®</sup> , Ranger <sup>®</sup> , Round Up <sup>®</sup>                                                                        | III                                                                                                                                                                 | 79.2                                       |
|              | Bipyridylium        | Paraquat          | Gramoxone <sup>®</sup> , Preglone <sup>®</sup> , Rafaga <sup>®</sup>                                                                                           | II                                                                                                                                                                  | 78.7                                       |
| Insecticides | Carbamate           | Carbofuran        | Carbodan <sup>®</sup> , Curator <sup>®</sup> , Furadan <sup>®</sup>                                                                                            | Ib                                                                                                                                                                  | 11.3                                       |
|              |                     | Benfuracarb       | Oncol <sup>®</sup>                                                                                                                                             | II                                                                                                                                                                  | 39.4                                       |
|              | Organophosphate     | Acephate          | Acefate <sup>®</sup> , Orthene <sup>®</sup> , Yucal <sup>®</sup>                                                                                               | II                                                                                                                                                                  | 58.8                                       |
|              |                     | Chlorpyrifos      | Agromil <sup>®</sup> , Batazo <sup>®</sup> , Baygon <sup>®</sup> , Lorsban <sup>®</sup> , Solver <sup>®</sup> , Terminator <sup>®</sup> , Swat <sup>®</sup>    | II                                                                                                                                                                  | 57.0                                       |
|              |                     | Fenamiphos        | Fenemiphos <sup>®</sup> , Nemacur <sup>®</sup>                                                                                                                 | Ib                                                                                                                                                                  | 36.7                                       |
|              | Pyrethroids         | Phorate           | Forato <sup>®</sup> , Thimet <sup>®</sup> , Thimetoato <sup>®</sup> , Timefor <sup>®</sup>                                                                     | Ia                                                                                                                                                                  | 54.8                                       |
|              |                     |                   | Cypermethrin                                                                                                                                                   | Best <sup>®</sup> , Cascabel <sup>®</sup> , Cipermetrina <sup>®</sup> , Combat <sup>®</sup> , Cruz Verde <sup>®</sup> , Tigre <sup>®</sup> , Excalibur <sup>®</sup> | II                                         |

\*Ia: extremely hazardous, Ib: highly hazardous; II: moderately hazardous, III: slightly hazardous, U: unlikely to present acute hazard
