# Supplementary material for: Variability and predictors of weekly pesticide exposure in applicators from organic, sustainable and conventional smallholder farms in Costa Rica
Source: PubMed Central journal article supplement — Occup Environ Med. 2019 Dec 3;77(1):40–7. doi: 10.1136/oemed-2019-105884 (PMC6929695; doi:10.1136/oemed-2019-105884), 2019-12-03

**Supplementary Figure S2.** Consort flow chart explain study participants' inclusion to derive datasets 1 and 2 used in multivariate mixed-models, Zarcero County, Costa Rica, 2016.

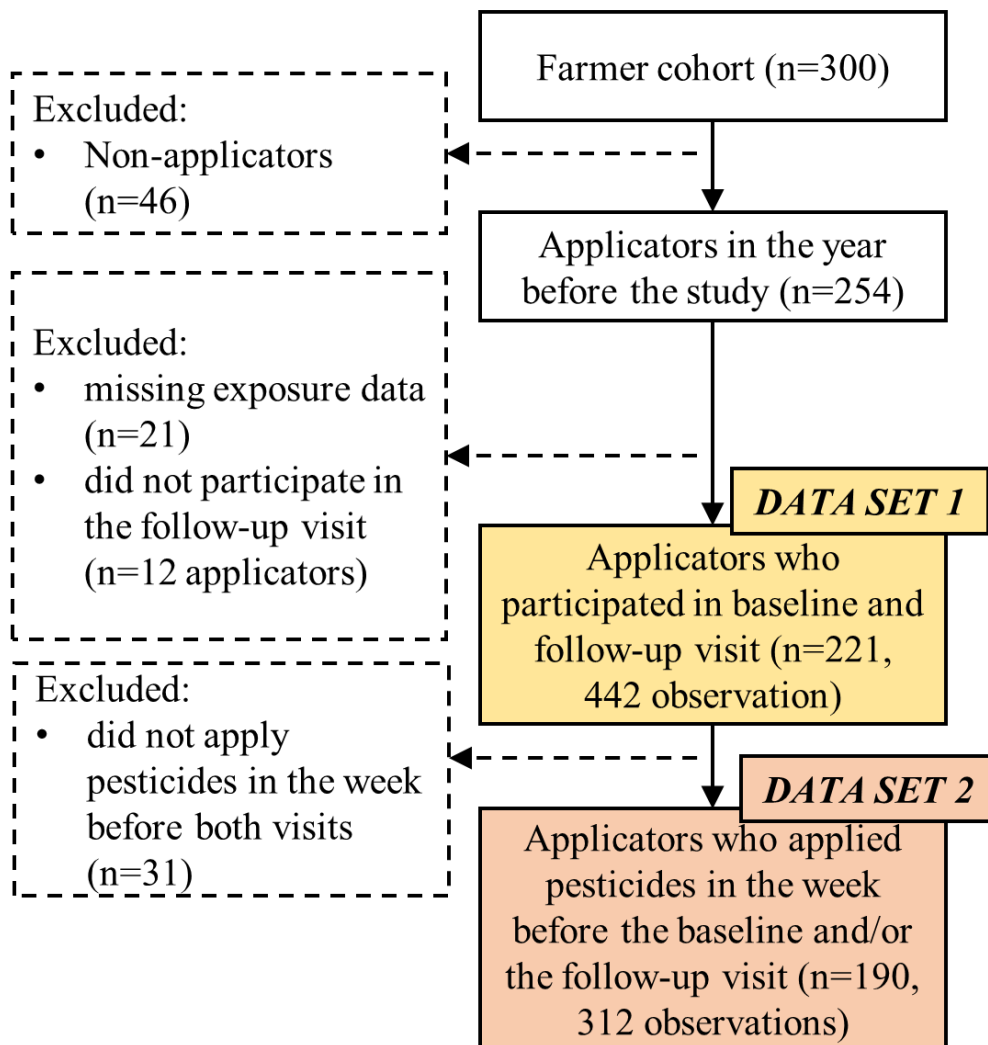

Supplement: oemed-2019-105884supp002.pdf [file oemed-2019-105884supp002.pdf]
