# Supplementary material for: Variability and predictors of weekly pesticide exposure in applicators from organic, sustainable and conventional smallholder farms in Costa Rica
Source: PubMed Central journal article supplement — Occup Environ Med. 2019 Dec 3;77(1):40–7. doi: 10.1136/oemed-2019-105884 (PMC6929695; doi:10.1136/oemed-2019-105884), 2019-12-03

**Supplementary Figure S3.** Frequency of personal protective equipment (PPE) used during pesticide application and related exposure scores of the respective body areas, Zarcero County, Costa Rica, 2016.

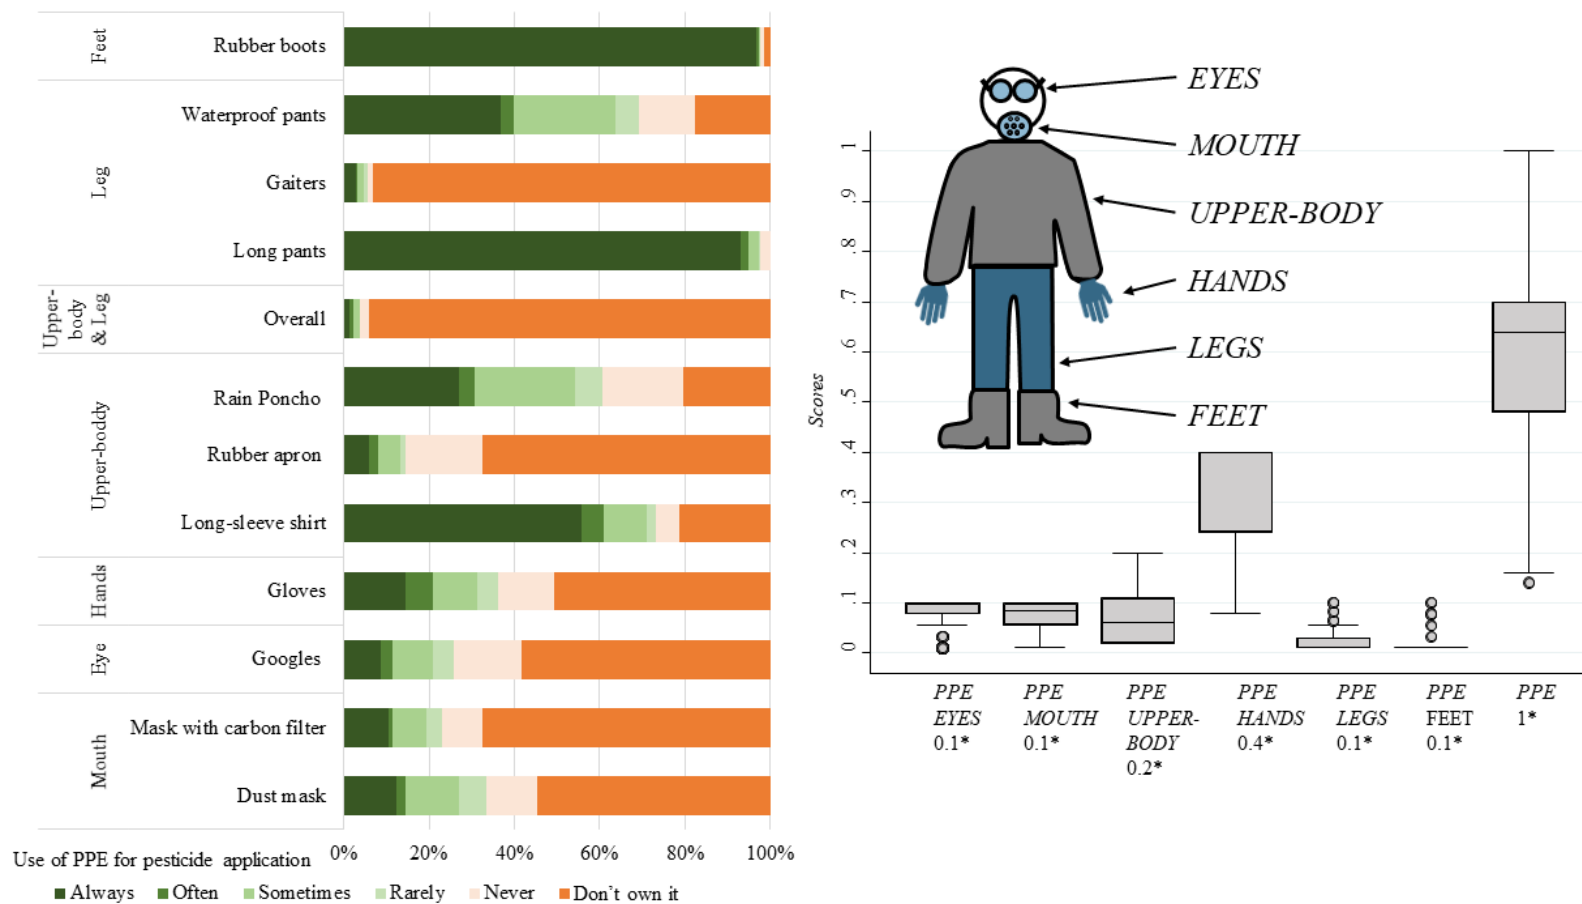

Supplement: oemed-2019-105884supp003.pdf [file oemed-2019-105884supp003.pdf]
