# Supplementary material for: Variability and predictors of weekly pesticide exposure in applicators from organic, sustainable and conventional smallholder farms in Costa Rica
Source: PubMed Central journal article supplement — Occup Environ Med. 2019 Dec 3;77(1):40–7. doi: 10.1136/oemed-2019-105884 (PMC6929695; doi:10.1136/oemed-2019-105884), 2019-12-03
Supplement: oemed-2019-105884supp004.pdf [file oemed-2019-105884supp004.pdf]

**Supplementary Table S4.** Bivariate mixed-effect regression models for weekly pesticide exposure, Zarcero County, Costa Rica, 2016.

| Predictor (N=442)            |                                         | exp(B) | (B 95% CI ) |      | p-value |
|------------------------------|-----------------------------------------|--------|-------------|------|---------|
| Farm type                    | Organic                                 | 1.00   |             |      |         |
|                              | Sustainable                             | 1.83   | 0.90        | 3.74 | 0.09    |
|                              | Conventional                            | 2.29   | 1.18        | 4.44 | 0.01    |
| Years worked with pesticides |                                         | 0.99   | 0.98        | 1.00 | 0.07    |
| Training                     | No                                      | 1.00   |             |      |         |
|                              | Yes                                     | 0.59   | 0.41        | 0.85 | 0.00    |
| Nationality                  | Costa Rica                              | 1.00   |             |      |         |
|                              | Nicaragua                               | 1.41   | 0.97        | 2.05 | 0.08    |
| Age (years)                  |                                         | 0.99   | 0.97        | 1.00 | 0.04    |
| Education                    | 6 <sup>th</sup> grade and under         | 1.00   |             |      |         |
|                              | 7 <sup>th</sup> -11 <sup>th</sup> grade | 1.02   | 0.63        | 1.65 | 0.93    |
|                              | Finished high school                    | 0.84   | 0.47        | 1.50 | 0.55    |
| Alphabetism                  | No                                      | 1.00   |             |      |         |
|                              | Yes                                     | 0.93   | 0.35        | 2.50 | 0.88    |
| Household income*            | Above poverty line                      | 1.00   |             |      |         |
|                              | Below poverty line                      | 1.02   | 0.68        | 1.52 | 0.93    |
| Ownership                    | Worker                                  | 1.00   |             |      |         |
|                              | Owern                                   | 0.85   | 0.59        | 1.24 | 0.40    |

\*Costa Rica poverty line in 2016: 95'761 CRC [38]
